# Supplementary material for: Quantum chemical study of benzimidazole derivatives to tune the second-order nonlinear optical molecular switching by proton abstraction
Source: Royal Society of Chemistry journal article supplement (doi:10.1039/b924241d), 2010-01-01
Supplement: b924241d.pdf [file b924241d.pdf]

## Supporting Information

### Quantum Chemical Study of Benzimidazole Derivatives to Tune the Second-order Nonlinear Optical Molecular Switching by Proton Abstraction

Shabbir Muhammad<sup>a</sup>, Hongliang Xu<sup>a,\*</sup>, Muhammad Ramzan Saeed Ashraf Janjua<sup>a</sup>,

Zhongmin Su<sup>a,\*</sup>, Muhammad Nadeem<sup>b,c</sup>

<sup>a</sup> Institute of Functional Material Chemistry, Faculty of Chemistry, Northeast Normal University, Changchun 130024, P.R. China.

<sup>b</sup> Formerly at Department of Chemistry, University of Agriculture, Faisalabad-38040, Punjab, Pakistan.

<sup>c</sup> Currently at Subsurface Technology, Petronas Research Sdn Bhd (PRSB), Bangi-43300, Selangor, Malaysia.

\*Email: [zmsu@nenu.edu.cn](mailto:zmsu@nenu.edu.cn)

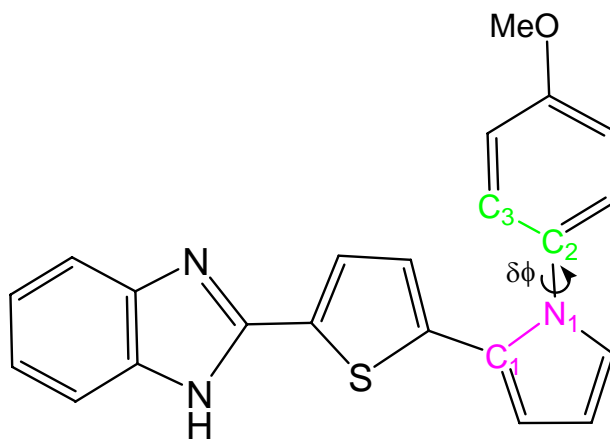

**Fig. S1** Representation of dihedral angle in pristine molecule **1**

**Table S1** The change in dihedral angles between neutral and anionic structures of pristine molecule **1** and its derivatives in Set II

| Neutral   | Dihedral angle ( $\phi$ )<br>C <sub>1</sub> -N <sub>1</sub> -C <sub>2</sub> -C <sub>3</sub> | Anion                 | Dihedral angle ( $\phi$ )<br>C <sub>1</sub> -N <sub>1</sub> -C <sub>2</sub> -C <sub>3</sub> | $\Delta \phi$     |
|-----------|---------------------------------------------------------------------------------------------|-----------------------|---------------------------------------------------------------------------------------------|-------------------|
| <b>1</b>  | 57.26                                                                                       | <b>1<sup>-</sup></b>  | 47.85                                                                                       | 9.41 <sup>o</sup> |
| <b>1a</b> | 57.30                                                                                       | <b>1a<sup>-</sup></b> | 47.49                                                                                       | 9.81 <sup>o</sup> |
| <b>1b</b> | 43.92                                                                                       | <b>1b<sup>-</sup></b> | 37.18                                                                                       | 6.74 <sup>o</sup> |
| <b>1c</b> | 43.37                                                                                       | <b>1c<sup>-</sup></b> | 37.28                                                                                       | 6.09 <sup>o</sup> |
| <b>1d</b> | 43.71                                                                                       | <b>1d<sup>-</sup></b> | 38.72                                                                                       | 4.99 <sup>o</sup> |

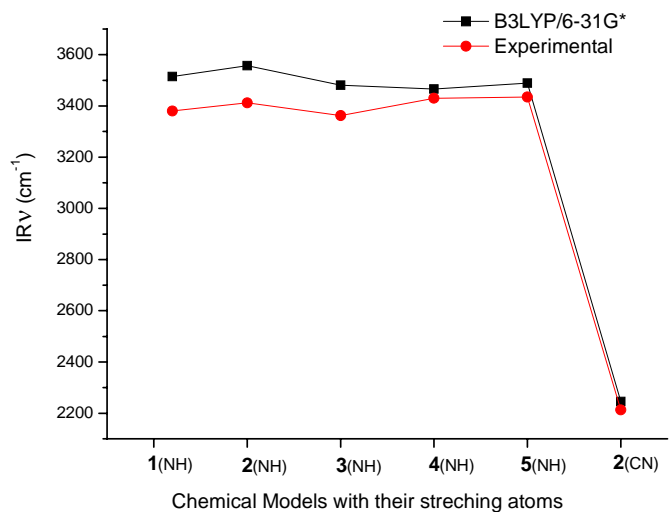

**Fig. S2** The trend of calculated and experimental N-H and CN stretching frequencies for all systems in set I.

The origin of NLO response

The individual diagonal and off-diagonal components of parent compound **1** and its derivatives have been shown in Table S2. It can be seen that diagonal components  $\beta_{xxx}$  is significantly larger and dominant in all the systems except **1d** which has slightly higher off-diagonal component  $\beta_{xyy}$ . It is noteworthy that all the anionic species have small ratio  $\eta = \beta_{xyy}/\beta_{xxx}$  which is called Cartesian nonlinear anisotropy and is a relevant factor for assessing the 2D character of the molecular  $\beta_{ijk}$  tensor. The values of  $\eta$  are very low even range from 0.037 to 0.081 which represents that all the anionic species prototype push-pull chromophores. The slightly higher ratios in neutral compounds might be due to the weak acceptor strength of benzimidazole moiety in push-pull configuration of neutral species. The similar trend of typical

push-pull chromophore can also be observed in electron density difference maps

given in Figure 5.

**Table. S2** The individual components of  $\beta$  value along x-axis

| Systems               | $\beta_{xzz}$ | $\beta_{xyy}$ | $\beta_{xxx}$ | $\eta = \beta_{xyy}/\beta_{xxx}$ | $\beta_X$ | $\beta_0$ |
|-----------------------|---------------|---------------|---------------|----------------------------------|-----------|-----------|
| <b>1</b>              | 0.15          | 3.26          | 19.11         | 0.170                            | 13.53     | 14.38     |
| <b>1<sup>-</sup></b>  | 0.26          | 7.43          | 91.31         | 0.081                            | 59.41     | 60.60     |
| <b>1a</b>             | 0.09          | 1.68          | 7.22          | 0.233                            | 5.40      | 5.86      |
| <b>1a<sup>-</sup></b> | 0.00          | 4.73          | 61.27         | 0.077                            | 39.60     | 40.24     |
| <b>1b</b>             | 0.03          | 6.04          | 6.86          | 0.886                            | 7.80      | 16.00     |
| <b>1b<sup>-</sup></b> | 4.83          | 60.48         | 1601.61       | 0.037                            | 1000.20   | 1014.00   |
| <b>1c</b>             | 0.23          | 8.46          | 14.30         | 0.591                            | 13.80     | 14.00     |
| <b>1c<sup>-</sup></b> | 3.91          | 10.51         | 1832.79       | 0.057                            | 1165.20   | 1189.00   |
| <b>1d</b>             | 0.23          | 9.04          | 30.88         | 0.292                            | 24.00     | 27.00     |
| <b>1d<sup>-</sup></b> | 14.80         | 17.28         | 3123.98       | 0.055                            | 1986.00   | 2028.00   |

**Table. S3** The estimated change in dipole moments along x-axis, in neutral and anionic systems **1** and its derivatives

| Neutral               | $\mu_{ge}$ (B3LYP) | $\mu_{ge}$ (HF) | $\mu_{ee}$ (CIS) | $\mu_{ee}-\mu_{gg}$ | $\mu_{ee}-\mu_{gg}$ (FF) |
|-----------------------|--------------------|-----------------|------------------|---------------------|--------------------------|
| <b>1</b>              | -1.34051           | 1.576551        | 2.884009         | 1.307458            | -1.8700                  |
| <b>1a</b>             | 1.18944            | 1.622185        | 3.15359          | 1.531405            | -1.9375                  |
| <b>1b</b>             | 0.974491           | 1.590005        | 5.353116         | 3.763111            | 4.986182                 |
| <b>1c</b>             | 1.148295           | 1.686941        | 6.20177          | 4.514829            | 6.805393                 |
| <b>1d</b>             | -0.72185           | -0.79636        | 0.661537         | 1.457897            | 3.44708                  |
| <b>Anions</b>         |                    |                 |                  |                     |                          |
| <b>1<sup>-</sup></b>  | -5.26834           | -6.57655        | -3.58401         | 2.992542            | -1.4663                  |
| <b>1a<sup>-</sup></b> | -4.313503          | -6.62218        | -3.15359         | 3.468595            | 5.027143                 |
| <b>1b<sup>-</sup></b> | 4.56832            | -8.5900         | -4.35312         | 4.236889            | 7.288811                 |
| <b>1c<sup>-</sup></b> | 4.717063           | 6.786941        | -3.90018         | -10.6871            | 8.70775                  |
| <b>1d<sup>-</sup></b> | -6.24247           | -8.79636        | -1.40154         | 7.394823            | 5.024041                 |

First of all, a comparison between the results of both Hartree Fock (HF) and finite field (FF) methods shows no reasonable agreement with each other. The only trend we found common between two methods is that ( $\mathbf{1c}$ ,  $\mathbf{1c}^-$ ) pair and ( $\mathbf{1}$ ,  $\mathbf{1}^-$ ) pair have highest and lowest changes in dipole moments respectively which is same in both the methods. The results of HF method might be considered reasonable because ground state dipole moments calculated by HF and B3LYP methods are close to each other especially in case of neutral molecules.

In addition, the comparison of  $\mu_{ee}-\mu_{gg}$  factors for neutral and anions shows no exact cancellation of each other because  $\mu_{ee}-\mu_{gg}$  factors for anions are higher than in neutral compounds with both the methods. Although the higher values of  $\mu_{ee}-\mu_{gg}$  factors in anions might attribute to enhance the  $\beta$  value but these might not be considered reliable due the inherited inconsistency in calculating the dipole moment of anions.

**Table S 4** NBO analysis of three  $\mathbf{1X}^-$  (X=F, Cl, Br) complexes

| System                       | NBO charges |        | Wiberg bond index |       |
|------------------------------|-------------|--------|-------------------|-------|
|                              | N           | X      | N-H               | H-X   |
| $\mathbf{1}\cdot\text{F}^-$  | -0.627      | -0.631 | 0.137             | 0.527 |
| $\mathbf{1}\cdot\text{Cl}^-$ | -0.556      | -0.858 | 0.621             | 0.157 |
| $\mathbf{1}\cdot\text{Br}^-$ | -0.555      | -0.860 | 0.635             | 0.151 |
